# Supplementary material for: Green Waste-Derived Substances Immobilized on SBA-15 Silica: Surface Properties, Adsorbing and Photosensitizing Activities towards Organic and Inorganic Substrates
Source: PubMed Central journal article supplement (PMC6409592; doi:10.3390/nano9020162), 2019-01-29
Supplement: nanomaterials-09-00162-s001.pdf [file nanomaterials-09-00162-s001.pdf]

*Supplementary materials*

## **Green Waste-Derived Substances Immobilized on SBA-15 Silica: Surface Properties, Adsorbing and Photosensitizing Activities towards Organic and Inorganic Substrates**

Maria Laura Tummino<sup>1</sup>, Maria Luisa Testa<sup>2</sup>, Mery Malandrino<sup>1</sup>, Roberta Gamberini<sup>3</sup>, Alessandra Bianco Prevot<sup>1</sup>, Giuliana Magnacca<sup>1,4</sup>, Enzo Laurenti<sup>1,\*</sup>

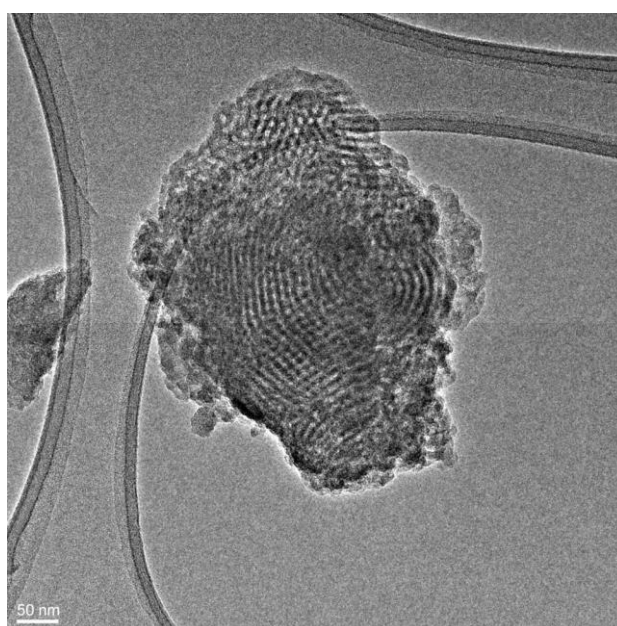

**Figure S1.** TEM image of BBS-SBA material

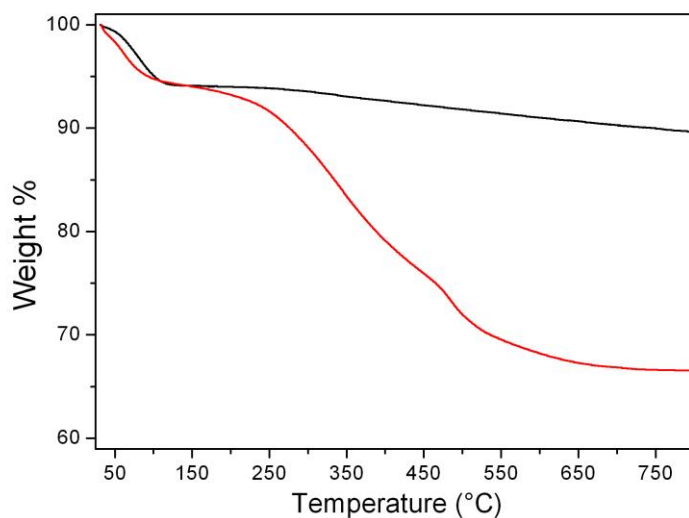

**Figure 2.** TGA curves of SBA (black line) and BBS-SBA (red line) materials obtained in air with a temperature ramp of  $10^{\circ}\text{C min}^{-1}$ . The amount of organics, determined as difference between the weight loss at  $800^{\circ}\text{C}$  of BBS-SBA and SBA materials, corresponds to 23%, comprehensive of linker and BBS. Further details in ref [10].

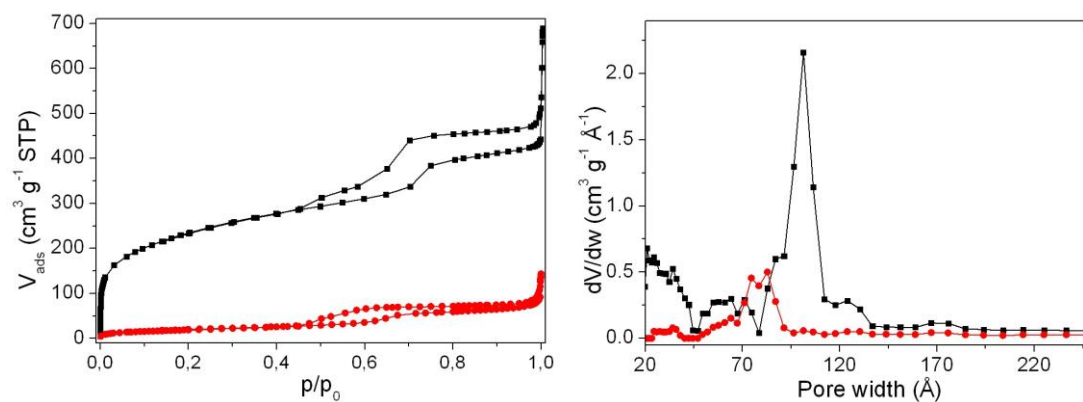

**Figure 3.**  $\text{N}_2$  adsorption–desorption isotherms at 77 K (left) and mesopore size distribution (right) of SBA (black) and BBS-SBA (red) after thermal activation *in vacuo* at  $60^{\circ}\text{C}$ .
